# Supplementary material
Source: Research Square preprint supplement (doi:10.21203/rs.3.rs-9653993/v1)
Supplement: Supplementary file 1 [file e92000b260af7fabe60f0c78.docx]

**Contents**

| Supplementary Table 1 | 1 |
| --- | --- |
| Supplementary Table 2 | 1-2 |

**Table S1. Multivariate logistic regression analysis**

| Variables | β | S. E | Z | P | OR (95%CI) |
| --- | --- | --- | --- | --- | --- |
|
| Intercept | -9.81 | 1.31 | -7.52 | <.001 | 0.00 (0.00 ~ 0.00) |
| Gender |  |  |  |  |  |
| male |  |  |  |  | 1.00 (Reference) |
| female | -1.46 | 0.34 | -4.36 | <.001 | 0.23 (0.12 ~ 0.45) |
| Age | 0.09 | 0.02 | 6.10 | <.001 | 1.10 (1.07 ~ 1.13) |
| PLT | -0.01 | 0.00 | -4.21 | <.001 | 0.99 (0.99 ~ 0.99) |
| EV-miR21(log10) | 2.12 | 0.44 | 4.78 | <.001 | 8.33 (3.49 ~ 19.87) |
| AFP (log10) | 1.69 | 0.25 | 6.69 | <.001 | 5.41 (3.30 ~ 8.88) |
| PIVKA-II (log10) | 1.30 | 0.25 | 5.11 | <.001 | 3.67 (2.23 ~ 6.04) |

Abbreviations: PLT, Platelet count; EV-miR21, Serum extracellular vesicle miR-21 level (log-transformed); AFP, Alpha fetoprotein; PIVKA-II, Protein induced by vitamin K absence or antagonist-II (log-transformed); OR, Odds ratio; CI, Confidence interval; β, Regression coefficient; S.E, Standard error of the regression coefficient; Z, Wald Z-value; OR (95% CI), Odds ratio with 95% confidence interval.

**Table S2. Comparison of single markers and the GAPMAP model in the training cohort**

| Maker | AUC | 95% CI | Sen (%) | Spe (%) |
| --- | --- | --- | --- | --- |
| AFP | 0.843 | 0.799-0.866 | 87.46 | 71.79 |
| PIVKA-Ⅱ | 0.852 | 0.814-0.882 | 86.34 | 76.43 |
| AFP-L3% | 0.767 | 0.720-0.800 | 88.95 | 65.23 |
| EV-miR-21 | 0.808 | 0.767-0.838 | 83.14 | 67.14 |
| EV-miR-150-5p | 0.796 | 0.760-0.832 | 71.80 | 80.36 |
| EV-miR-125a-5p | 0.613 | 0.612-0.701 | 84.55 | 43.64 |
| GAPMAP | 0.948 | 0.934-0.972 | 87.91 | 88.95 |

Abbreviations: Area under the ROC curve, AUC; 95% confidence interval, 95% CI; Sen%, Sensitivity Percentage; Spe%, Specificity Percentage; AFP, alpha-fetoprotein; AFP-L3%, alpha-fetoprotein variant L3 percentage; PIVKA-II, protein induced by vitamin K absence or antagonist-II; EV-miR21, extracellular vesicle miR-21; EV-miR125a-5p, extracellular vesicle miR-125a-5p; EV-miR150-5p, extracellular vesicle miR-150-5p
